# Supplementary material for: Evolution and spread of glyphosate resistance in Conyza canadensis in California
Source: PubMed Central journal article supplement (PMC5779124; doi:10.1111/eva.12061), 2013-03-11
Supplement: EVA-6-761-s001.pdf [file EVA-6-761-s001.pdf]

## Supporting Information

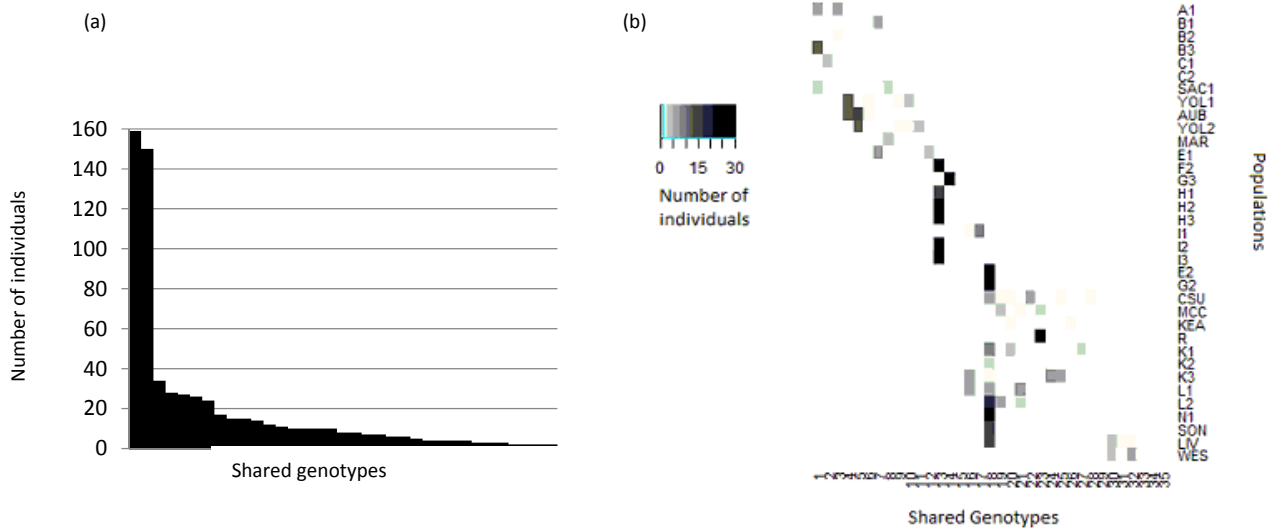

**Fig. S1** (a) The number of individuals found with identical genotypes that are shared across populations in horseweed, and (b) a heatmap of the 35 shared genotypes showing their distribution in sampled populations. Genotypes 13 and 18 are the two most widespread genotypes.

**Table S1** Characteristics of the six new microsatellite markers for *Conyza canadensis*.

| Marker  | PCR primer sequence (5' to 3')                             | GenBank<br>Accession No. | Repeat motif                                                                                           | Amplicon<br>size (bp) |
|---------|------------------------------------------------------------|--------------------------|--------------------------------------------------------------------------------------------------------|-----------------------|
| HWSSR01 | F: TATGTTGTACGACTGACTGAGATC<br>R: CCATTGACTGTAGACCAGTGTG   | JX440849                 | (CTAT) <sub>21</sub>                                                                                   | 176                   |
| HWSSR03 | F: TTGACTCCAACCTCGTAGTGTATG<br>R: ACGTTAAATCTCTCGTGTCCCTC  | JX440851                 | (TG) <sub>7</sub> (TA) <sub>4</sub> TG(TA) <sub>2</sub> TG(TA) <sub>5</sub><br>AG(TATATG) <sub>8</sub> | 190                   |
| HWSSR04 | F: GGAAAACTCCTGTCATAGTATTAGC<br>R: ATTAAAATCTAGCAAGGCCGAAC | JX440852                 | (AAT) <sub>18</sub>                                                                                    | 229                   |
| HWSSR09 | F: CATGAGTTTGAGTTATCCCAGAT<br>R: CGAATACTTTCAATGCTTACGAC   | JX440857                 | (TTAAT) <sub>6</sub>                                                                                   | 202                   |
| HWSSR11 | F: ATCGTTGACATCTGACTCTGC<br>R: GATTCTTGCTCTGGTTCCTTG       | JX440859                 | (GAT) <sub>15</sub>                                                                                    | 190                   |
| HWSSR12 | F: CATAACAAACGGATTAGTGGCG<br>R: ATTATTGACGACCAACAACACC     | JX440860                 | (TAA) <sub>15</sub>                                                                                    | 273                   |

**Table S2** Genetic diversity detected at 12 microsatellite loci in 1300 individuals of *Conyza canadensis*. Allele sizes (bp);  $TA$ , total number of alleles detected;  $H_O$ , observed heterozygosity;  $H_S$ , expected heterozygosity within populations;  $H_T$ , expected heterozygosity over all samples.  $F_{IS}$ , Wright's inbreeding coefficient, and  $F_{ST}$ , Wright's fixation index (Weir & Cockerham 1984), were averaged over 44 populations from California.

| Locus   | Allele sizes<br>(bp) | $TA$ | $H_O$ | $H_S$ | $H_T$ | $F_{IS}$ | $F_{ST}$ |
|---------|----------------------|------|-------|-------|-------|----------|----------|
| HW02    | 158-170              | 7    | 0.009 | 0.081 | 0.096 | 0.882*** | 0.163*** |
| HW06    | 209-219              | 7    | 0.012 | 0.125 | 0.269 | 0.902*** | 0.542*** |
| HW07    | 206-228              | 5    | 0.005 | 0.158 | 0.383 | 0.966*** | 0.593*** |
| HW14    | 191-204              | 7    | 0.008 | 0.047 | 0.053 | 0.850*** | 0.127*** |
| HW17    | 144-180              | 17   | 0.014 | 0.364 | 0.850 | 0.962*** | 0.576*** |
| HW29    | 148-185              | 2    | 0.000 | 0.003 | 0.003 | 1.000**  | 0.034*   |
| HWSSR01 | 121-228              | 21   | 0.016 | 0.323 | 0.774 | 0.950*** | 0.588*** |
| HWSSR03 | 155-213              | 9    | 0.011 | 0.230 | 0.648 | 0.953*** | 0.650*** |
| HWSSR04 | 217-286              | 23   | 0.024 | 0.445 | 0.894 | 0.948*** | 0.510*** |
| HWSSR09 | 189-205              | 3    | 0.001 | 0.021 | 0.081 | 0.962*** | 0.753*** |
| HWSSR11 | 172-258              | 10   | 0.015 | 0.322 | 0.642 | 0.955*** | 0.507*** |
| HWSSR12 | 167-288              | 14   | 0.019 | 0.393 | 0.86  | 0.951*** | 0.550*** |
| Mean    |                      | 10.4 | 0.011 | 0.209 | 0.463 | 0.947    | 0.554    |

$P$  values: \*\*\*  $P < 0.001$ , \*\*  $P < 0.01$ , \*  $P < 0.05$ .



**Table S4** Multilocus microsatellite marker genotype data in resistant populations E2, F2, H2, H3, I1, K1, L1, L2, and N1. Multilocus genotypes that occurred more than once are identified by lowercase letters and singletons are identified by the population in which they occurred.

| ID | n  | HW07 | HW17 | HW06 | HWSSR01 | HW14 | HWSSR12 | HW02 | HW29 | HWSSR09 | HWSSR03 | HWSSR04 | HWSSR11 |     |     |     |     |     |     |     |     |     |     |     |     |
|----|----|------|------|------|---------|------|---------|------|------|---------|---------|---------|---------|-----|-----|-----|-----|-----|-----|-----|-----|-----|-----|-----|-----|
| a  | 85 | 226  | 226  | 149  | 149     | 213  | 213     | 121  | 121  | 200     | 200     | 258     | 258     | 162 | 162 | 148 | 148 | 205 | 205 | 155 | 155 | 262 | 262 | 191 | 191 |
| b  | 93 | 228  | 228  | 168  | 168     | 213  | 213     | 179  | 179  | 200     | 200     | 270     | 270     | 162 | 162 | 148 | 148 | 205 | 205 | 191 | 191 | 229 | 229 | 194 | 194 |
| c  | 14 | 228  | 228  | 168  | 168     | 211  | 211     | 179  | 179  | 200     | 200     | 270     | 270     | 162 | 162 | 148 | 148 | 205 | 205 | 191 | 191 | 229 | 229 | 194 | 194 |
| d  | 11 | 226  | 226  | 166  | 166     | 213  | 213     | 125  | 125  | 200     | 200     | 270     | 270     | 162 | 162 | 148 | 148 | 205 | 205 | 195 | 195 | 238 | 238 | 200 | 200 |
| e  | 10 | 226  | 226  | 166  | 166     | 213  | 213     | 171  | 171  | 200     | 200     | 249     | 249     | 162 | 162 | 148 | 148 | 205 | 205 | 195 | 195 | 265 | 265 | 191 | 191 |
| f  | 10 | 226  | 226  | 168  | 168     | 213  | 213     | 125  | 125  | 200     | 200     | 249     | 249     | 162 | 162 | 148 | 148 | 205 | 205 | 195 | 195 | 238 | 238 | 200 | 200 |
| g  | 8  | 228  | 228  | 166  | 166     | 213  | 213     | 125  | 125  | 200     | 200     | 270     | 270     | 162 | 162 | 148 | 148 | 205 | 205 | 195 | 195 | 238 | 238 | 200 | 200 |
| h  | 5  | 226  | 226  | 166  | 166     | 213  | 213     | 125  | 125  | 200     | 200     | 249     | 249     | 162 | 162 | 148 | 148 | 205 | 205 | 195 | 195 | 238 | 238 | 200 | 200 |
| i  | 3  | 226  | 226  | 168  | 168     | 213  | 213     | 179  | 179  | 200     | 200     | 270     | 270     | 162 | 162 | 148 | 148 | 205 | 205 | 195 | 195 | 238 | 238 | 200 | 200 |
| j  | 2  | 226  | 226  | 162  | 162     | 213  | 213     | 228  | 228  | 196     | 196     | 264     | 264     | 162 | 162 | 148 | 148 | 205 | 205 | 155 | 155 | 265 | 265 | 185 | 185 |
| k  | 2  | 228  | 228  | 166  | 166     | 213  | 213     | 179  | 179  | 200     | 200     | 270     | 270     | 162 | 162 | 148 | 148 | 205 | 205 | 195 | 195 | 238 | 238 | 200 | 200 |
| l  | 2  | 228  | 228  | 166  | 166     | 213  | 213     | 179  | 179  | 200     | 200     | 270     | 270     | 162 | 162 | 148 | 148 | 205 | 205 | 195 | 195 | 229 | 229 | 194 | 194 |
| m  | 2  | 228  | 228  | 166  | 166     | 213  | 213     | 179  | 179  | 200     | 200     | 273     | 273     | 162 | 162 | 148 | 148 | 205 | 205 | 155 | 155 | 220 | 220 | 200 | 200 |
| E2 | 1  | 226  | 226  | 155  | 155     | 213  | 213     | 121  | 121  | 200     | 200     | 258     | 258     | 162 | 162 | 148 | 148 | 205 | 205 | 155 | 155 | 262 | 262 | 191 | 191 |
| F2 | 1  | 226  | 226  | 149  | 149     | 213  | 213     | 121  | 121  | 200     | 200     | 255     | 258     | 162 | 162 | 148 | 148 | 205 | 205 | 155 | 155 | 262 | 262 | 191 | 191 |
| H2 | 1  | 226  | 226  | 168  | 168     | 213  | 213     | 179  | 179  | 200     | 200     | 167     | 167     | 162 | 162 | 148 | 148 | 205 | 205 | 155 | 155 | 226 | 226 | 194 | 194 |
| H2 | 1  | 226  | 226  | 149  | 149     | 213  | 213     | 121  | 121  | 200     | 200     | 258     | 258     | 162 | 162 | 148 | 148 | 205 | 205 | 155 | 155 | 238 | 238 | 191 | 191 |
| H2 | 1  | 227  | 227  | 166  | 166     | 213  | 213     | 179  | 179  | 200     | 200     | 270     | 270     | 162 | 162 | 148 | 148 | 205 | 205 | 184 | 184 | 262 | 262 | 200 | 200 |
| H3 | 1  | 226  | 226  | 164  | 164     | 213  | 213     | 171  | 171  | 200     | 200     | 264     | 264     | 162 | 162 | 148 | 148 | 205 | 205 | 155 | 155 | 265 | 265 | 194 | 194 |
| I1 | 1  | 228  | 228  | 168  | 168     | 211  | 211     | 179  | 183  | 200     | 200     | 270     | 270     | 162 | 162 | 148 | 148 | 205 | 205 | 191 | 191 | 229 | 229 | 194 | 194 |
| K1 | 1  | 226  | 226  | 166  | 166     | 213  | 213     | 179  | 179  | 200     | 200     | 249     | 249     | 162 | 162 | 148 | 148 | 205 | 205 | 191 | 191 | 229 | 229 | 194 | 194 |
| K1 | 1  | 226  | 226  | 166  | 166     | 213  | 213     | 171  | 171  | 200     | 200     | 270     | 270     | 162 | 162 | 148 | 148 | 205 | 205 | 195 | 195 | 265 | 265 | 191 | 191 |
| K1 | 1  | 228  | 228  | 168  | 168     | 213  | 213     | 125  | 125  | 200     | 200     | 249     | 249     | 162 | 162 | 148 | 148 | 205 | 205 | 191 | 191 | 238 | 238 | 200 | 200 |
| K1 | 1  | 226  | 226  | 168  | 168     | 213  | 213     | 129  | 129  | 200     | 200     | 249     | 249     | 164 | 164 | 148 | 148 | 205 | 205 | 155 | 155 | 265 | 265 | 194 | 194 |
| K1 | 1  | 226  | 226  | 160  | 160     | 213  | 213     | 171  | 171  | 200     | 200     | 270     | 270     | 162 | 162 | 148 | 148 | 205 | 205 | 195 | 195 | 265 | 265 | 191 | 191 |
| K1 | 1  | 226  | 226  | 168  | 168     | 213  | 213     | 125  | 125  | 200     | 200     | 270     | 270     | 162 | 162 | 148 | 148 | 205 | 205 | 191 | 191 | 238 | 238 | 200 | 200 |
| K1 | 1  | 226  | 226  | 166  | 166     | 213  | 213     | 125  | 125  | 200     | 200     | 249     | 249     | 162 | 162 | 148 | 148 | 205 | 205 | 191 | 191 | 229 | 229 | 194 | 194 |
| K1 | 1  | 228  | 228  | 160  | 160     | 213  | 213     | 179  | 179  | 200     | 200     | 270     | 270     | 162 | 162 | 148 | 148 | 205 | 205 | 155 | 191 | 229 | 229 | 194 | 194 |
| K1 | 1  | 226  | 226  | 166  | 168     | 213  | 213     | 179  | 179  | 200     | 200     | 249     | 270     | 162 | 162 | 148 | 148 | 205 | 205 | 191 | 195 | 229 | 238 | 194 | 200 |
| L1 | 1  | 226  | 226  | 168  | 168     | 213  | 213     | 179  | 179  | 200     | 200     | 270     | 270     | 162 | 162 | 148 | 148 | 205 | 205 | 191 | 191 | 238 | 238 | 194 | 194 |
| L1 | 1  | 226  | 228  | 166  | 168     | 213  | 213     | 179  | 179  | 200     | 200     | 270     | 270     | 162 | 162 | 148 | 148 | 205 | 205 | 191 | 195 | 229 | 229 | 194 | 194 |
| L1 | 1  | 226  | 226  | 168  | 168     | 213  | 213     | 125  | 166  | 200     | 200     | 249     | 267     | 162 | 162 | 148 | 148 | 205 | 205 | 195 | 195 | 238 | 238 | 200 | 200 |
| L1 | 1  | 226  | 226  | 168  | 168     | 213  | 213     | 125  | 158  | 200     | 200     | 249     | 270     | 162 | 162 | 148 | 148 | 205 | 205 | 195 | 195 | 238 | 238 | 200 | 200 |
| L1 | 1  | 228  | 228  | 166  | 166     | 213  | 213     | 125  | 179  | 200     | 200     | 270     | 270     | 162 | 162 | 148 | 148 | 205 | 205 | 195 | 195 | 238 | 238 | 200 | 200 |
| L2 | 1  | 228  | 228  | 166  | 166     | 213  | 213     | 125  | 125  | 200     | 200     | 267     | 270     | 162 | 162 | 148 | 148 | 205 | 205 | 195 | 195 | 238 | 238 | 200 | 200 |

**Table S5** Model checking for the four scenarios with no recent admixture (Fig. 2A). HET, mean expected heterozygosity in population; VAR, mean allelic size variance in population; DAS, shared allele distance between populations. Populations 1 through 4 correspond to P1, P2, P3, and P4. Significant tail-area probabilities for each test quantity after applying the false discovery rate correction method of Benjamini and Hochberg (1995) for multiple tests.

| Test quantity (t) | observed value | probability ( $t_{\text{simulated}} < t_{\text{observed}}$ ) |    |            |    |            |    |            |    |
|-------------------|----------------|--------------------------------------------------------------|----|------------|----|------------|----|------------|----|
|                   |                | Scenario 1                                                   |    | Scenario 2 |    | Scenario 3 |    | Scenario 4 |    |
| HET_P1            | 0.2484         | 0.5150                                                       | ns | 0.5950     | ns | 0.5050     | ns | 0.4800     | ns |
| HET_P2            | 0              | 0.0200                                                       | ns | 0.0150     | ns | 0.0100     | ns | 0.0050     | ns |
| HET_P3            | 0.0028         | 0.3600                                                       | ns | 0.3400     | ns | 0.3800     | ns | 0.2200     | ns |
| HET_P4            | 0              | 0.1450                                                       | ns | 0.1700     | ns | 0.1650     | ns | 0.1750     | ns |
| VAR_P1            | 3.2121         | 0.7900                                                       | ns | 0.8400     | ns | 0.7900     | ns | 0.7100     | ns |
| VAR_P2            | 0              | 0.0200                                                       | ns | 0.0150     | ns | 0.0100     | ns | 0.0050     | ns |
| VAR_P3            | 0.0014         | 0.3400                                                       | ns | 0.3200     | ns | 0.3500     | ns | 0.2100     | ns |
| VAR_P4            | 0              | 0.1550                                                       | ns | 0.1700     | ns | 0.1700     | ns | 0.1750     | ns |
| DAS_P1&2          | 0.5287         | 0.6250                                                       | ns | 0.7100     | ns | 0.6550     | ns | 0.6200     | ns |
| DAS_P1&3          | 0.6322         | 0.6900                                                       | ns | 0.7700     | ns | 0.7800     | ns | 0.7200     | ns |
| DAS_P1&4          | 0.4195         | 0.3800                                                       | ns | 0.3000     | ns | 0.3350     | ns | 0.4200     | ns |
| DAS_P2&3          | 0.5833         | 0.7350                                                       | ns | 0.6600     | ns | 0.7350     | ns | 0.6950     | ns |
| DAS_P2&4          | 0.5            | 0.4350                                                       | ns | 0.4550     | ns | 0.3000     | ns | 0.3700     | ns |
| DAS_P3&4          | 0.4167         | 0.3800                                                       | ns | 0.3500     | ns | 0.2600     | ns | 0.2700     | ns |

**Table S6** Model checking for the best scenario(s) in DIYABC analyses (Cornuet et al. 2008, 2010) with scenario sets B and C (Figs 2B and 2C) in *Conyza canadensis*. HET, mean expected heterozygosity in population; VAR, mean allelic size variance in population; DAS, shared allele distance between populations. Populations 1 through 5 correspond to P1, P2, P3, P4 and P5. Significant tail-area probabilities ( $t_{\text{simulated}} < t_{\text{observed}}$ ) for each test quantity after applying the false discovery rate correction method of Benjamini and Hochberg (1995) for multiple tests.

| Test quantity (t) | C2,S,a,b,d     |                        |                        |                        |                        | C2,c,a,e,f     |             | C2,b,a,d,k     |             | C2,b,a,h,i     |             |
|-------------------|----------------|------------------------|------------------------|------------------------|------------------------|----------------|-------------|----------------|-------------|----------------|-------------|
|                   | observed value | Scenario 1 probability | Scenario 2 probability | Scenario 1 probability | Scenario 2 probability | observed value | probability | observed value | probability | observed value | probability |
| HET_P1            | 0.2484         | 0.615                  | ns                     | 0.545                  | ns                     | 0.2484         | 0.440       | 0.2484         | 0.340       | 0.2484         | 0.330       |
| HET_P2            | 0              | 0.005                  | ns                     | 0.030                  | ns                     | 0              | 0.235       | 0              | 0.230       | 0              | 0.130       |
| HET_P3            | 0              | 0.170                  | ns                     | 0.145                  | ns                     | 0              | 0.110       | 0              | 0.205       | 0              | 0.185       |
| HET_P4            | 0              | 0.135                  | ns                     | 0.095                  | ns                     | 0              | 0.165       | 0              | 0.260       | 0              | 0.270       |
| HET_P5            | 0              | 0.140                  | ns                     | 0.175                  | ns                     | 0              | 0.220       | 0              | 0.260       | 0              | 0.270       |
| VAR_P1            | 3.2121         | 0.830                  | ns                     | 0.760                  | ns                     | 3.2121         | 0.640       | 3.2121         | 0.730       | 3.2121         | 0.630       |
| VAR_P2            | 0              | 0.005                  | ns                     | 0.030                  | ns                     | 0              | 0.235       | 0              | 0.235       | 0              | 0.130       |
| VAR_P3            | 0              | 0.170                  | ns                     | 0.145                  | ns                     | 0              | 0.110       | 0              | 0.210       | 0              | 0.195       |
| VAR_P4            | 0              | 0.145                  | ns                     | 0.095                  | ns                     | 0              | 0.170       | 0              | 0.260       | 0              | 0.270       |
| VAR_P5            | 0              | 0.140                  | ns                     | 0.175                  | ns                     | 0              | 0.220       | 0              | 0.260       | 0              | 0.270       |
| DAS_P1&2          | 0.5287         | 0.720                  | ns                     | 0.680                  | ns                     | 0.3391         | 0.270       | 0.4195         | 0.510       | 0.4195         | 0.480       |
| DAS_P1&3          | 0.6322         | 0.760                  | ns                     | 0.560                  | ns                     | 0.6322         | 0.730       | 0.6322         | 0.690       | 0.6322         | 0.805       |
| DAS_P1&4          | 0.4195         | 0.395                  | ns                     | 0.460                  | ns                     | 0.523          | 0.790       | 0.5833         | 0.800       | 0.5776         | 0.880       |
| DAS_P1&5          | 0.5833         | 0.800                  | ns                     | 0.845                  | ns                     | 0.5776         | 0.865       | 0.4195         | 0.460       | 0.5029         | 0.750       |
| DAS_P2&3          | 0.5833         | 0.745                  | ns                     | 0.740                  | ns                     | 0.3333         | 0.270       | 0.4167         | 0.375       | 0.4167         | 0.530       |
| DAS_P2&4          | 0.5            | 0.350                  | ns                     | 0.435                  | ns                     | 0.3333         | 0.185       | 0.5            | 0.325       | 0.4167         | 0.330       |
| DAS_P2&5          | 0.6667         | 0.670                  | ns                     | 0.710                  | ns                     | 0.4167         | 0.270       | 0.6667         | 0.375       | 0.6667         | 0.365       |
| DAS_P3&4          | 0.4167         | 0.340                  | ns                     | 0.385                  | ns                     | 0.5833         | 0.825       | 0.5            | 0.605       | 0.5            | 0.735       |
| DAS_P3&5          | 0.5            | 0.555                  | ns                     | 0.520                  | ns                     | 0.5            | 0.645       | 0.4167         | 0.425       | 0.5            | 0.740       |
| DAS_P4&5          | 0.5            | 0.425                  | ns                     | 0.395                  | ns                     | 0.6667         | 0.640       | 0.8333         | 0.445       | 0.75           | 0.445       |

**Table S7 parameter estimation** Prior and posterior parameter values in analysis of scenario set A (Fig. 2A) for Scenario 1 and Scenario 1 through 4 analyzed together in DIYABC (Cornuet et al. 2008, 2010). CI, credible interval; population size estimates (Nr, Nb3, Nb4, Nb, and Ne) refer to the effective breeding population;  $\mu$ , mean mutation rate; time in generations (t3, t4, b3, b4, t5, t6, t1a, t1b, t2a, t2b, t7, and t8); P, mean coefficient of the geometric distribution under the Generalized Stepwise Mutation (GSM model);  $\mu_{\text{sni}}$ , mean single nucleotide insertion-deletion mutation rate.

|                                       | prior values     |                  | Scenario 1          |                     |                     |                     | Scenario 1-4        |                     |                     |                     |                     |                     |
|---------------------------------------|------------------|------------------|---------------------|---------------------|---------------------|---------------------|---------------------|---------------------|---------------------|---------------------|---------------------|---------------------|
|                                       |                  |                  | mean                | median              | mode                | 95% CI              | mean                | median              | mode                | 95% CI              |                     |                     |
| Resistant populations                 |                  |                  |                     |                     |                     |                     |                     |                     |                     |                     |                     |                     |
| t3                                    | 1                | 150              | 105                 | 112                 | 143                 | 31                  | 149                 | 107                 | 114                 | 148                 | 32                  | 149                 |
| t4                                    | 1                | 150              | 103                 | 108                 | 149                 | 29                  | 149                 | 104                 | 110                 | 148                 | 31                  | 149                 |
| b3                                    | 1                | 150              | 74                  | 76                  | 104                 | 8                   | 136                 | 76                  | 78                  | 89                  | 8                   | 136                 |
| b4                                    | 1                | 150              | 89                  | 94                  | 118                 | 14                  | 141                 | 89                  | 94                  | 112                 | 13                  | 141                 |
| t5                                    | 150              | 10000            | 4930                | 4920                | 3950                | 716                 | 9030                | 4740                | 4680                | 3940                | 761                 | 8920                |
| t6                                    | 150              | 10000            | 5900                | 6140                | 6720                | 1300                | 9310                | 5840                | 6030                | 6540                | 1350                | 9320                |
| Nr                                    | 10               | 10 <sup>5</sup>  | 53300               | 54900               | 91300               | 2730                | 97900               | 49700               | 49600               | 10                  | 2060                | 97600               |
| Nb3                                   | 2                | 100              | 22                  | 14                  | 3                   | 2                   | 86                  | 23                  | 14                  | 3                   | 2                   | 86                  |
| Nb4                                   | 2                | 100              | 24                  | 15                  | 2                   | 2                   | 89                  | 22                  | 13                  | 2                   | 2                   | 85                  |
| Nb                                    | 2                | 100              | 66                  | 71                  | 95                  | 10                  | 99                  | 64                  | 68                  | 96                  | 9                   | 99                  |
| Susceptible populations               |                  |                  |                     |                     |                     |                     |                     |                     |                     |                     |                     |                     |
| t1a                                   | 2                | 150              | 37                  | 23                  | 2                   | 2                   | 132                 | 39                  | 25                  | 3                   | 2                   | 133                 |
| t1b                                   | 2                | 150              | 35                  | 23                  | 3                   | 2                   | 129                 | 38                  | 25                  | 2                   | 2                   | 132                 |
| t2a                                   | 2                | 150              | 101                 | 110                 | 148                 | 14                  | 149                 | 101                 | 111                 | 148                 | 14                  | 149                 |
| t2b                                   | 2                | 150              | 96                  | 105                 | 145                 | 11                  | 149                 | 100                 | 109                 | 146                 | 13                  | 149                 |
| r1                                    | 0.001            | 0.999            | 0.639               | 0.674               | 0.958               | 0.117               | 0.979               | 0.593               | 0.620               | 0.936               | 0.085               | 0.971               |
| r2                                    | 0.001            | 0.999            | 0.517               | 0.511               | 0.996               | 0.008               | 0.994               | 0.494               | 0.485               | 0.001               | 0.007               | 0.993               |
| t7                                    | 150              | 10000            | 5770                | 6010                | 6770                | 923                 | 9360                | 5570                | 5790                | 6800                | 796                 | 9320                |
| t8                                    | 150              | 10000            | 1260                | 779                 | 160                 | 171                 | 5540                | 1410                | 885                 | 157                 | 176                 | 5840                |
| Resistant and susceptible populations |                  |                  |                     |                     |                     |                     |                     |                     |                     |                     |                     |                     |
| ta                                    | 150              | 10000            | 8720                | 9020                | 9960                | 5930                | 9960                | 8790                | 9080                | 9890                | 6050                | 9960                |
| Ne                                    | 10               | 10000            | 2030                | 1310                | 383                 | 120                 | 8130                | 2230                | 1390                | 439                 | 122                 | 8770                |
| $\mu$                                 | 1E <sup>-5</sup> | 1E <sup>-4</sup> | 4.7E <sup>-05</sup> | 4.5E <sup>-05</sup> | 3.6E <sup>-05</sup> | 1.7E <sup>-05</sup> | 9.2E <sup>-05</sup> | 4.6E <sup>-05</sup> | 4.3E <sup>-05</sup> | 3.3E <sup>-05</sup> | 1.6E <sup>-05</sup> | 9.2E <sup>-05</sup> |
| P                                     | 1E <sup>-1</sup> | 7E <sup>-1</sup> | 6.3E <sup>-01</sup> | 6.7E <sup>-01</sup> | 7.0E <sup>-01</sup> | 2.1E <sup>-01</sup> | 7.0E <sup>-01</sup> | 6.1E <sup>-01</sup> | 6.5E <sup>-01</sup> | 7.0E <sup>-01</sup> | 1.0E <sup>-01</sup> | 7.0E <sup>-01</sup> |
| $\mu_{\text{sni}}$                    | 1E <sup>-9</sup> | 7E <sup>-5</sup> | 1.4E <sup>-06</sup> | 1.7E <sup>-07</sup> | 1.0E <sup>-09</sup> | 1.0E <sup>-09</sup> | 8.5E <sup>-06</sup> | 1.5E <sup>-06</sup> | 2.0E <sup>-07</sup> | 2.0E <sup>-09</sup> | 1.0E <sup>-09</sup> | 8.6E <sup>-06</sup> |



**Table S8** Prior and posterior parameter values obtained in DIYABC (Cornuet et al. 2008, 2010) in *Conyza canadensis* for Scenario 1 and Scenario 2 of scenario set B (Fig. 2B) tested using populations/multilocus genotypes, C2, S, a, b, and d, as P1 through P5, respectively. CI, credible interval; population size estimates (Nb3, Nb4, Nb5, Nb, Nr3, Nr4, Nr5 and Ne) refer to the effective breeding population;  $\mu$ , mean mutation rate; time in generations (t3, t4, t5, b3, b4, b5, t6, t1a, t1b, t2a, t2b, t7, t9, t10, t10h, and t11);  $P$ , mean coefficient of the geometric distribution under the Generalized Stepwise Mutation (GSM model);  $\mu_{\text{sni}}$ , mean single nucleotide insertion-deletion mutation rate.

|                         | prior values |                 | Scenario 1 |        |       |        | Scenario 2 |        |       |        |       |       |
|-------------------------|--------------|-----------------|------------|--------|-------|--------|------------|--------|-------|--------|-------|-------|
|                         |              |                 | mean       | median | mode  | 95% CI | mean       | median | mode  | 95% CI |       |       |
| Resistant populations   |              |                 |            |        |       |        |            |        |       |        |       |       |
| t3                      | 1            | 150             | 99         | 104    | 146   | 26     | 148        | 109    | 116   | 150    | 37    | 149   |
| t4                      | 1            | 150             | 99         | 104    | 150   | 26     | 149        | 101    | 106   | 147    | 27    | 149   |
| t5                      | 1            | 150             | 97         | 102    | 122   | 23     | 148        | 103    | 109   | 148    | 27    | 149   |
| b3                      | 1            | 150             | 83         | 87     | 115   | 10     | 139        | 93     | 99    | 123    | 14    | 143   |
| b4                      | 1            | 150             | 83         | 87     | 109   | 11     | 140        | 85     | 90    | 103    | 11    | 141   |
| b5                      | 1            | 150             | 73         | 75     | 91    | 7      | 136        | 82     | 85    | 108    | 8     | 140   |
| t10                     | 150          | 10000           | 5210       | 5220   | 5240  | 1020   | 9020       | -      | -     | -      | -     | -     |
| t10h                    | 150          | 10000           | -          | -      | -     | -      | -          | 4300   | 4240  | 4360   | 715   | 8150  |
| t6                      | 150          | 10000           | 5980       | 6160   | 6750  | 1470   | 9350       | 7120   | 7340  | 7750   | 3580  | 9540  |
| t7                      | 150          | 10000           | 6830       | 7270   | 8480  | 1590   | 9630       | 5930   | 6180  | 7270   | 1110  | 9440  |
| Nb3                     | 2            | 100             | 27         | 18     | 3     | 2      | 90         | 27     | 18    | 3      | 2     | 91    |
| Nb4                     | 2            | 100             | 27         | 19     | 5     | 2      | 90         | 27     | 18    | 3      | 2     | 90    |
| Nb5                     | 2            | 100             | 30         | 21     | 3     | 2      | 92         | 28     | 19    | 3      | 2     | 90    |
| Nr3                     | 10           | 1E <sup>6</sup> | 49400      | 49300  | 1010  | 2060   | 97000      | 50400  | 50700 | 82200  | 2470  | 97300 |
| Nr4                     | 10           | 1E <sup>6</sup> | 48200      | 47300  | 5050  | 2220   | 97400      | 46300  | 45000 | 3000   | 1780  | 96800 |
| Nr5                     | 10           | 1E <sup>6</sup> | 50700      | 50900  | 73800 | 2580   | 97500      | 47100  | 45800 | 12600  | 2180  | 97300 |
| r5                      | 0.001        | 0.009           | -          | -      | -     | -      | -          | 0.552  | 0.575 | 0.710  | 0.041 | 0.976 |
| Susceptible populations |              |                 |            |        |       |        |            |        |       |        |       |       |
| t1a                     | 2            | 150             | 37         | 24     | 2     | 2      | 132        | 36     | 23    | 3      | 2     | 130   |
| t1b                     | 2            | 150             | 43         | 30     | 3     | 3      | 137        | 37     | 25    | 3      | 2     | 132   |
| t2a                     | 2            | 150             | 93         | 100    | 140   | 10     | 148        | 96     | 104   | 142    | 11    | 149   |
| t2b                     | 2            | 150             | 94         | 100    | 142   | 11     | 148        | 98     | 107   | 147    | 12    | 149   |
| r1                      | 0.001        | 0.009           | 0.662      | 0.706  | 0.845 | 0.134  | 0.976      | 0.613  | 0.640 | 0.650  | 0.108 | 0.972 |
| r2                      | 0.001        | 0.009           | 0.452      | 0.380  | 0.003 | 0.006  | 0.990      | 0.484  | 0.459 | 0.002  | 0.008 | 0.991 |
| t9                      | 150          | 10000           | 5560       | 5700   | 5720  | 1050   | 9250       | 4730   | 4700  | 4700   | 756   | 8910  |
| t11                     | 150          | 10000           | 1300       | 821    | 153   | 171    | 5450       | 1260   | 808   | 197    | 176   | 5120  |

| Nb                                    | 2                 | 100               | 75                  | 82                  | 98                  | 19                  | 100                 | 73                  | 80                  | 99                  | 16                  | 100                 |
|---------------------------------------|-------------------|-------------------|---------------------|---------------------|---------------------|---------------------|---------------------|---------------------|---------------------|---------------------|---------------------|---------------------|
| Resistant and susceptible populations |                   |                   |                     |                     |                     |                     |                     |                     |                     |                     |                     |                     |
| ta                                    | 150               | 10000             | 9030                | 9270                | 9830                | 6800                | 9970                | 9010                | 9260                | 9950                | 6680                | 9970                |
| Ne                                    | 10                | 10000             | 1060                | 630                 | 220                 | 78                  | 5300                | 1330                | 828                 | 354                 | 92                  | 6180                |
| $\mu$                                 | 1E <sup>-05</sup> | 1E <sup>-04</sup> | 5.1E <sup>-05</sup> | 4.9E <sup>-05</sup> | 3.6E <sup>-05</sup> | 1.9E <sup>-05</sup> | 9.3E <sup>-05</sup> | 5.0E <sup>-05</sup> | 4.8E <sup>-05</sup> | 3.6E <sup>-05</sup> | 1.9E <sup>-05</sup> | 9.3E <sup>-05</sup> |
| P                                     | 1E <sup>-01</sup> | 1E <sup>-07</sup> | 5.7E <sup>-01</sup> | 6.3E <sup>-01</sup> | 7.0E <sup>-01</sup> | 1.0E <sup>-01</sup> | 7.0E <sup>-01</sup> | 5.7E <sup>-01</sup> | 6.2E <sup>-01</sup> | 7.0E <sup>-01</sup> | 1.0E <sup>-01</sup> | 7.0E <sup>-01</sup> |
| $\mu$ sni                             | 1E <sup>-09</sup> | 1E <sup>-05</sup> | 1.3E <sup>-06</sup> | 1.7E <sup>-07</sup> | 1.0E <sup>-09</sup> | 1.0E <sup>-09</sup> | 8.3E <sup>-06</sup> | 1.3E <sup>-06</sup> | 1.6E <sup>-07</sup> | 1.0E <sup>-09</sup> | 1.0E <sup>-09</sup> | 8.3E <sup>-06</sup> |

**Table S9** Prior and posterior parameter values obtained in DIYABC (Cornuet et al. 2008, 2010) in *Conyza canadensis* for Scenario 2 of scenario set C (Fig. 2C) tested using populations/multilocus genotypes, C2,c,a,e, and f, as P1 through P5, respectively. CI, credible interval; population size estimates (Nb2, Nb3, Nb4, Nb5, Nb, Nr, Nr4, Nr5 and Ne) refer to the effective breeding population;  $\mu$ , mean mutation rate; time in generations (t2, t3, t4, t5, th5, b3, b4, b5, t1a, t1b, t6, t7, and t9);  $P$ , mean coefficient of the geometric distribution under the Generalized Stepwise Mutation (GSM model);  $\mu_{\text{sni}}$ , mean single nucleotide insertion-deletion mutation rate.

|                                       | prior values      |                   | Scenario 2 (C2,c,a,e,f) |                     |                     |                     |                     |
|---------------------------------------|-------------------|-------------------|-------------------------|---------------------|---------------------|---------------------|---------------------|
|                                       |                   |                   | mean                    | median              | mode                | 95% CI              |                     |
| Resistant populations                 |                   |                   |                         |                     |                     |                     |                     |
| t2                                    | 1                 | 150               | 113                     | 120                 | 143                 | 41                  | 149                 |
| t3                                    | 1                 | 150               | 106                     | 112                 | 147                 | 32                  | 149                 |
| t4                                    | 1                 | 150               | 108                     | 115                 | 148                 | 35                  | 149                 |
| t5                                    | 1                 | 150               | 106                     | 113                 | 149                 | 32                  | 149                 |
| b2                                    | 1                 | 150               | 91                      | 97                  | 117                 | 14                  | 142                 |
| b3                                    | 1                 | 150               | 81                      | 85                  | 85                  | 10                  | 138                 |
| b4                                    | 1                 | 150               | 79                      | 81                  | 97                  | 10                  | 139                 |
| b5                                    | 1                 | 150               | 83                      | 87                  | 109                 | 10                  | 141                 |
| th5                                   | 150               | 10000             | 2670                    | 2360                | 1760                | 419                 | 6520                |
| r5                                    | 0.001             | 0.009             | 0.398                   | 0.357               | 0.199               | 0.019               | 0.943               |
| t6                                    | 150               | 10000             | 6800                    | 6950                | 7050                | 3360                | 9420                |
| t9                                    | 150               | 10000             | 4890                    | 4880                | 4140                | 798                 | 8940                |
| Nb2                                   | 2                 | 100               | 18                      | 10                  | 2                   | 2                   | 78                  |
| Nb3                                   | 2                 | 100               | 19                      | 11                  | 2                   | 2                   | 80                  |
| Nb4                                   | 2                 | 100               | 19                      | 11                  | 2                   | 2                   | 80                  |
| Nb5                                   | 2                 | 100               | 18                      | 10                  | 2                   | 2                   | 79                  |
| Nr                                    | 10                | 1E <sup>+06</sup> | 46600                   | 44700               | 12000               | 1940                | 96600               |
| Nr4                                   | 10                | 1E <sup>+06</sup> | 45200                   | 43200               | 3260                | 1920                | 96600               |
| Nr5                                   | 10                | 1E <sup>+06</sup> | 46000                   | 43800               | 1120                | 1870                | 96800               |
| Susceptible populations               |                   |                   |                         |                     |                     |                     |                     |
| t1a                                   | 2                 | 150               | 54                      | 44                  | 5                   | 3                   | 142                 |
| t1b                                   | 2                 | 150               | 54                      | 44                  | 7                   | 3                   | 141                 |
| t7                                    | 150               | 10000             | 4520                    | 4390                | 3180                | 588                 | 8940                |
| r1                                    | 0.001             | 0.009             | 0.583                   | 0.600               | 0.666               | 0.091               | 0.962               |
| Nb                                    | 2                 | 100               | 79                      | 86                  | 99                  | 24                  | 100                 |
| Resistant and susceptible populations |                   |                   |                         |                     |                     |                     |                     |
| ta                                    | 150               | 10000             | 8900                    | 9160                | 9970                | 6530                | 9970                |
| Ne                                    | 10                | 10000             | 2030                    | 1460                | 687                 | 183                 | 7460                |
| $\mu$                                 | 1E <sup>-05</sup> | 1E <sup>-04</sup> | 5.4E <sup>-05</sup>     | 5.2E <sup>-05</sup> | 4.2E <sup>-05</sup> | 2.1E <sup>-05</sup> | 9.6E <sup>-05</sup> |
| $P$                                   | 1E <sup>-01</sup> | 1E <sup>-07</sup> | 6.3E <sup>-01</sup>     | 6.7E <sup>-01</sup> | 7.0E <sup>-01</sup> | 2.5E <sup>-01</sup> | 7.0E <sup>-01</sup> |
| $\mu_{\text{sni}}$                    | 1E <sup>-09</sup> | 1E <sup>-05</sup> | 1.5E <sup>-06</sup>     | 2.0E <sup>-07</sup> | 2.0E <sup>-09</sup> | 2.0E <sup>-09</sup> | 8.8E <sup>-06</sup> |

**Table S10** Prior and posterior parameter values obtained in DIYABC (Cornuet et al. 2008, 2010) in *Conyza canadensis* for Scenario 4 of scenario set C (Fig. 2C) using two different sets of five populations/multilocus genotypes, C2, b, a, d, and k and C2, b, a, h, and i as populations, P1 through P5, respectively. CI, credible interval; population size estimates (Nb2, Nb3, Nb4, Nb5, Nb, Nr, Nr3, Nr4, Nr5 and Ne) refer to the effective breeding population;  $\mu$ , mean mutation rate; time in generations (t2, t3, t4, tr5, b3, b4, br5, t6, t1a, t1b, t7, t9, t10, t10h, and t11);  $P$ , mean coefficient of the geometric distribution under the Generalized Stepwise Mutation (GSM model);  $\mu_{\text{sn}}$ , mean single nucleotide insertion-deletion mutation rate.

|                         | prior values |                  | Scenario 4 (C2,b,a,d,k) |        |       |        |       | Scenario 4 (C2,b,a,h,i) |       |        |       |       |
|-------------------------|--------------|------------------|-------------------------|--------|-------|--------|-------|-------------------------|-------|--------|-------|-------|
|                         |              |                  | mean                    | median | mode  | 95% CI | mean  | median                  | mode  | 95% CI |       |       |
| Resistant populations   |              |                  |                         |        |       |        |       |                         |       |        |       |       |
| t2                      | 1            | 150              | 109                     | 116    | 145   | 38     | 149   | 101                     | 106   | 137    | 29    | 148   |
| t3                      | 1            | 150              | 105                     | 111    | 147   | 31     | 149   | 113                     | 120   | 149    | 42    | 149   |
| t4                      | 1            | 150              | 111                     | 118    | 149   | 41     | 149   | 115                     | 123   | 145    | 44    | 149   |
| tr5                     | 1            | 40               | 32                      | 34     | 40    | 14     | 40    | 31                      | 33    | 40     | 12    | 40    |
| b2                      | 1            | 150              | 90                      | 95     | 119   | 16     | 142   | 85                      | 89    | 99     | 15    | 140   |
| b3                      | 1            | 150              | 87                      | 92     | 109   | 12     | 141   | 93                      | 99    | 116    | 17    | 142   |
| b4                      | 1            | 150              | 84                      | 88     | 97    | 12     | 140   | 87                      | 93    | 112    | 12    | 142   |
| br5                     | 1            | 40               | 22                      | 23     | 25    | 3      | 38    | 22                      | 22    | 26     | 3     | 38    |
| r5                      | 0.001        | 0.009            | 0.321                   | 0.305  | 0.275 | 0.080  | 0.654 | 0.455                   | 0.447 | 0.433  | 0.146 | 0.802 |
| Nb2                     | 2            | 100              | 13                      | 7      | 2     | 2      | 67    | 16                      | 9     | 2      | 2     | 73    |
| Nb3                     | 2            | 100              | 13                      | 7      | 2     | 2      | 67    | 14                      | 7     | 2      | 2     | 67    |
| Nb4                     | 2            | 100              | 15                      | 8      | 2     | 2      | 72    | 17                      | 9     | 3      | 2     | 78    |
| Nb5                     | 2            | 100              | 10                      | 5      | 2     | 2      | 58    | 7                       | 3     | 2      | 2     | 41    |
| Nr                      | 10           | 1E <sup>06</sup> | 46900                   | 45600  | 4860  | 1740   | 96700 | 49800                   | 50000 | 77800  | 1870  | 97500 |
| Nr4                     | 10           | 1E <sup>06</sup> | 49600                   | 49200  | 28900 | 2140   | 97500 | 49400                   | 49100 | 22400  | 2320  | 97400 |
| Nr5                     | 10           | 1E <sup>06</sup> | 53100                   | 54500  | 94100 | 2910   | 97900 | 47300                   | 45500 | 1950   | 2000  | 97300 |
| Susceptible populations |              |                  |                         |        |       |        |       |                         |       |        |       |       |
| t1a                     | 2            | 150              | 64                      | 57     | 11    | 4      | 145   | 57                      | 47    | 5      | 4     | 142   |
| t1b                     | 2            | 150              | 52                      | 41     | 2     | 3      | 141   | 58                      | 49    | 12     | 4     | 143   |
| t7                      | 150          | 10000            | 4350                    | 4200   | 3830  | 461    | 8830  | 3990                    | 3780  | 2450   | 444   | 8580  |
| t9                      | 150          | 10000            | 4180                    | 3970   | 3360  | 592    | 8550  | 4310                    | 4160  | 3230   | 553   | 8710  |
| t6                      | 150          | 10000            | 4450                    | 4310   | 3900  | 801    | 8620  | 5390                    | 5450  | 6250   | 1150  | 9150  |
| r1                      | 0.001        | 0.009            | 0.571                   | 0.587  | 0.534 | 0.076  | 0.968 | 0.552                   | 0.563 | 0.617  | 0.073 | 0.961 |
| Nb                      | 2            | 100              | 71                      | 76     | 98    | 16     | 100   | 72                      | 78    | 99     | 17    | 100   |

---

Resistant and susceptible populations

|             |            |            |              |              |              |              |              |              |              |              |              |              |
|-------------|------------|------------|--------------|--------------|--------------|--------------|--------------|--------------|--------------|--------------|--------------|--------------|
| ta          | 150        | 10000      | 8630         | 8950         | 9860         | 5690         | 9960         | 8570         | 8890         | 9810         | 5470         | 9960         |
| Ne          | 10         | 10000      | 4050         | 3620         | 1530         | 403          | 9460         | 4190         | 3800         | 2350         | 451          | 9520         |
| $\mu$       | $1E^{-05}$ | $1E^{-04}$ | $4.4E^{-05}$ | $4.0E^{-05}$ | $3.1E^{-05}$ | $1.6E^{-05}$ | $9.3E^{-05}$ | $4.3E^{-05}$ | $3.9E^{-05}$ | $2.2E^{-05}$ | $1.5E^{-05}$ | $9.1E^{-05}$ |
| P           | $1E^{-01}$ | $1E^{-07}$ | $5.9E^{-01}$ | $6.4E^{-01}$ | $7.0E^{-01}$ | $2.0E^{-01}$ | $7.0E^{-01}$ | $6.2E^{-01}$ | $6.6E^{-01}$ | $7.0E^{-01}$ | $2.8E^{-01}$ | $7.0E^{-01}$ |
| $\mu_{sni}$ | $1E^{-09}$ | $1E^{-05}$ | $1.6E^{-06}$ | $2.1E^{-07}$ | $0.0E^{+00}$ | $0.0E^{+00}$ | $8.8E^{-06}$ | $1.7E^{-06}$ | $2.5E^{-07}$ | $2.0E^{-09}$ | $2.0E^{-09}$ | $9.0E^{-06}$ |

---
